# Supplementary material for: Vitamin C and Infections
Source: MDPI journal article supplement (doi:10.3390/nu9040339), 2017-03-29
Supplement: s1 [file s1]

## **Vitamin C and infections.**

**Harri Hemilä**

Supplementary file 2  
2017-3-19

### **Nutrients**

<http://www.mdpi.com/journal/nutrients>

Harri Hemilä, MD, PhD  
Department of Public Health,  
POB 20 University of Helsinki  
Tukholmankatu 8 B  
FIN-00014 Helsinki  
Finland  
[harri.hemila@helsinki.fi](mailto:harri.hemila@helsinki.fi)  
<http://www.mv.helsinki.fi/home/hemila>

### **Contents**

#### **Page**

2. Dose-response analysis of the Karlowski (1975) trial
3. Dose-response analysis of the Anderson (1974) trial
4. Table 5. Subgroup comparison of the Anderson (1972) trial by contact with children.
5. Table 5. Subgroup comparison of the Anderson (1972) trial by usual colds.
6. Table 5. Subgroup comparison of the Carr (1981) trial by living together or living apart.
7. Calculation of the ratio for common cold duration SD per mean for imputations

## Dose-response analysis of the Karlowksi (1975) trial

The main publication of Karlowksi (1975) was in JAMA:

<https://www.ncbi.nlm.nih.gov/pubmed/163386>

The SE values for the four groups were published in a parallel publication (Table 1):

<https://www.ncbi.nlm.nih.gov/pubmed/1106302>

<https://doi.org/10.1111/j.1749-6632.1975.tb29309.x>

| vitamin C<br>g/day | Group | Karlowksi<br>(1975) | Effect in % | No of<br>colds | SE   | Var  | Weight<br>for linear<br>regression |
|--------------------|-------|---------------------|-------------|----------------|------|------|------------------------------------|
|                    |       |                     |             |                |      |      | Inverse<br>Var                     |
| 0                  | #0    | 7.14                | 0.00%       | 65             | 0.46 | 0.21 | 4.726                              |
| 3                  | #1    | 6.46                | -9.52%      | 56             | 0.39 | 0.15 | 6.575                              |
| 3                  | #2    | 6.71                | -6.02%      | 52             | 0.53 | 0.28 | 3.560                              |
| 6                  | #3    | 5.92                | -17.09%     | 76             | 0.40 | 0.16 | 6.250                              |

Calculation of dose response using the inverse variance weight:

Change indicates the effect of vitamin C in percentages.

```
> Karlowksi
```

```
      Change InvVar Dose vitC
1    0.000  4.726    0     0
2   -9.524  6.575    3     1
3   -6.022  3.560    3     1
4  -17.087  6.250    6     1
```

```
> Karlowksi0 <- lm(Karlowksi$Change ~ Karlowksi$Dose, weights = Karlowksi$InvVar)
> summary(Karlowksi0)
```

Coefficients:

```
              Estimate Std. Error t value Pr(>|t|)
(Intercept)    0.1379     1.4812   0.093   0.9343
Karlowksi$Dose -2.8534     0.3827  -7.456   0.0175 *
```

Residual standard error: 3.785 on 2 degrees of freedom

Multiple R-squared: 0.9653, Adjusted R-squared: 0.9479

F-statistic: 55.59 on 1 and 2 DF, p-value: 0.01752

Comparison of **uniform** vitamin C effect versus **uniform + linear** vitamin C effect:

Inclusion of the linear effect improves the statistical model by Chisq (1 df) = 9.78, p = 0.0017.

```
> Karlowksi1 <- lm(Karlowksi$Change ~ Karlowksi$vitC, weights = Karlowksi$InvVar)
> Karlowksi2 <- lm(Karlowksi$Change ~ Karlowksi$vitC + Karlowksi$Dose, weights = Karlowksi$InvVar)
```

```
> lrtest(Karlowksi1,Karlowksi2)
```

Likelihood ratio test

Model 1: Karlowksi\$Change ~ Karlowksi\$vitC

Model 2: Karlowksi\$Change ~ Karlowksi\$vitC + Karlowksi\$Dose

```
  #Df  LogLik Df  Chisq Pr(>Chisq)
```

```
1    3 -11.2152
```

```
2    4  -6.3212  1  9.7879  0.001757
```

```
---
```

## Dose-response analysis of the Anderson (1974) trial

The Anderson (1974) data were published (Table II)

Placebo group #4 is for reasons described on p. 40 (Table 16) of Hemilä (2006) [1].

Table II gives the mean duration of colds as follows:

| vitamin C<br>g/day | Group | Reported           | Reported                  | Calculated          | Imputed | Weight<br>for linear<br>regression |        |                |             |
|--------------------|-------|--------------------|---------------------------|---------------------|---------|------------------------------------|--------|----------------|-------------|
|                    |       | Total no.<br>colds | Total<br>days<br>in group | Days per<br>episode | SD      | SE                                 | Var    | Inverse<br>Var | Effect in % |
| 0                  | #4    | 437                | 1539                      | 3.522               | 3.205   | 0.15                               | 0.0235 | 42.549         | 0.00%       |
| 4                  | #7    | 417                | 1325                      | 3.177               | 2.891   | 0.14                               | 0.0200 | 49.876         | -9.78%      |
| 8                  | #8    | 483                | 1380                      | 2.857               | 2.600   | 0.12                               | 0.0140 | 71.450         | -18.87%     |

SD= 0.91\*mean

Anderson (1974) did not publish the SD for the observations.

Above, SD is imputed with ratio  $SD = 0.91 * \text{mean}$ . See the last page of this document.

Furthermore, in Anderson (1972) the SD per mean ratio was 0.97 and 0.82 in the vitamin C and placebo groups, see the last page. Thus, the ratio 0.92 is also close to the ratios of Anderson's earlier study.

> A1974

```
Change InvVar Dose vitC
1  0.00 42.549  0  0
2 -9.78 49.876  4  1
3 -18.87 71.450  8  1
```

```
> Anderson0 <- lm(A1974$Change ~ A1974$Dose, weights = A1974$InvVar)
> summary(Anderson0)
```

Coefficients:

```
Estimate Std. Error t value Pr(>|t|)
(Intercept) -0.13778  0.27584  -0.50  0.705
A1974$Dose -2.35178  0.04818 -48.81  0.013 *
```

Residual standard error: 2.011 on 1 degrees of freedom

Multiple R-squared: 0.9996, Adjusted R-squared: 0.9992

F-statistic: 2382 on 1 and 1 DF, p-value: 0.01304

**Table 5. Subgroup comparison of the Anderson (1972) trial by contact with children.**  
<https://www.ncbi.nlm.nih.gov/pmc/articles/PMC1940935>

The ratio between SD and mean was calculated from the overall results of the trial  
 Anderson (1972) reported that (Table II):

**Vitamin C group**

Among 407 participants, for “days confined to house” SE = 0.101, corresponding to SD = 2.038.  
 The mean “days confined to house” was 1.30 so that the ratio = 1.567 (= 2.038/1.30)

**Placebo group**

Among 411 participants, for “days confined to house” SE = 0.138, corresponding to SD = 2.798.  
 The mean “days confined to house” was 1.87 so that the ratio = 1.496 (= 2.798/1.87)

The ratio of 1.57 was used for the imputation of the SD from the subgroup means.

Anderson (1972) reported that (Tables I and IV):

|                                    | Vitamin C | Placebo | Effect of vitamin C |
|------------------------------------|-----------|---------|---------------------|
| <b>Contact with young children</b> |           |         |                     |
| <b>Yes</b>                         |           |         |                     |
| Days confined to house:            | 1.31      | 2.43    | -46.1%              |
| Imputed SD:                        | 2.06      | 3.82    |                     |
| No of participants:                | 140       | 148     |                     |
| <b>No</b>                          |           |         |                     |
| Days confined to house:            | 1.30      | 1.56    | -16.7%              |
| Imputed SD:                        | 2.04      | 2.45    |                     |
| No of participants:                | 267       | 263     |                     |

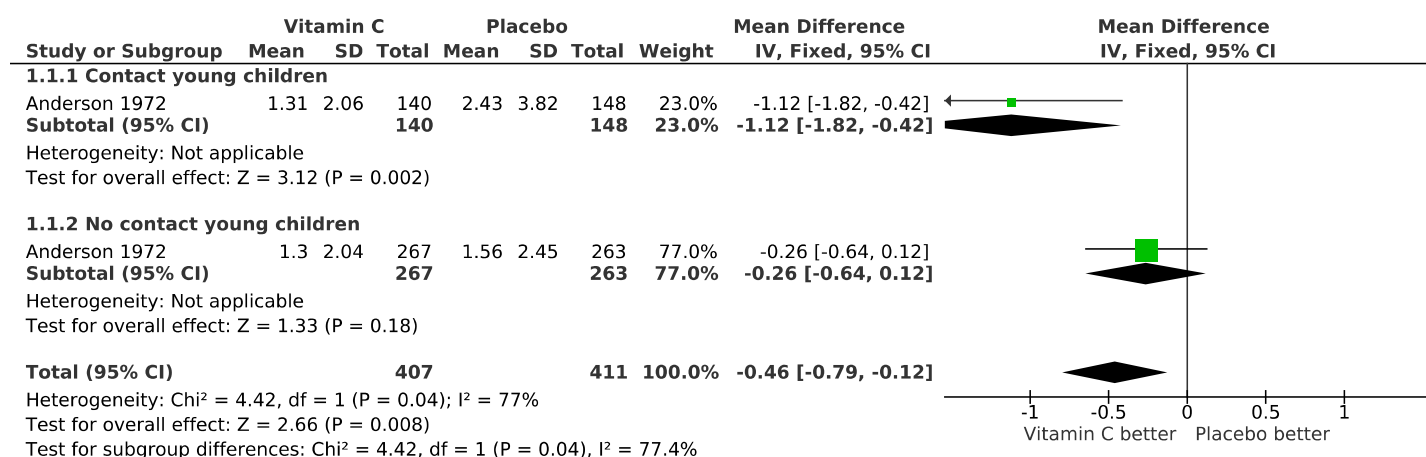

**Table 5. Subgroup comparison of the Anderson (1972) trial by usual colds.**

Anderson (1972) reported that (Tables I and IV):

The ratio 1.6 was used in the imputation of the SD for the means of the subgroups, see above.

|                               | Vitamin C | Placebo | Effect of vitamin C |
|-------------------------------|-----------|---------|---------------------|
| <b>Usual colds per winter</b> |           |         |                     |
| <b>≥2 colds</b>               |           |         |                     |
| Days confined to house:       | 1.31      | 2.29    | -42.8%              |
| Imputed SD:                   | 2.06      | 3.60    |                     |
| No of participants:           | 211       | 192     |                     |
| <b>0-1 colds</b>              |           |         |                     |
| Days confined to house:       | 1.30      | 1.50    | -13.3%              |
| Imputed SD:                   | 2.04      | 2.36    |                     |
| No of participants:           | 196       | 219     |                     |

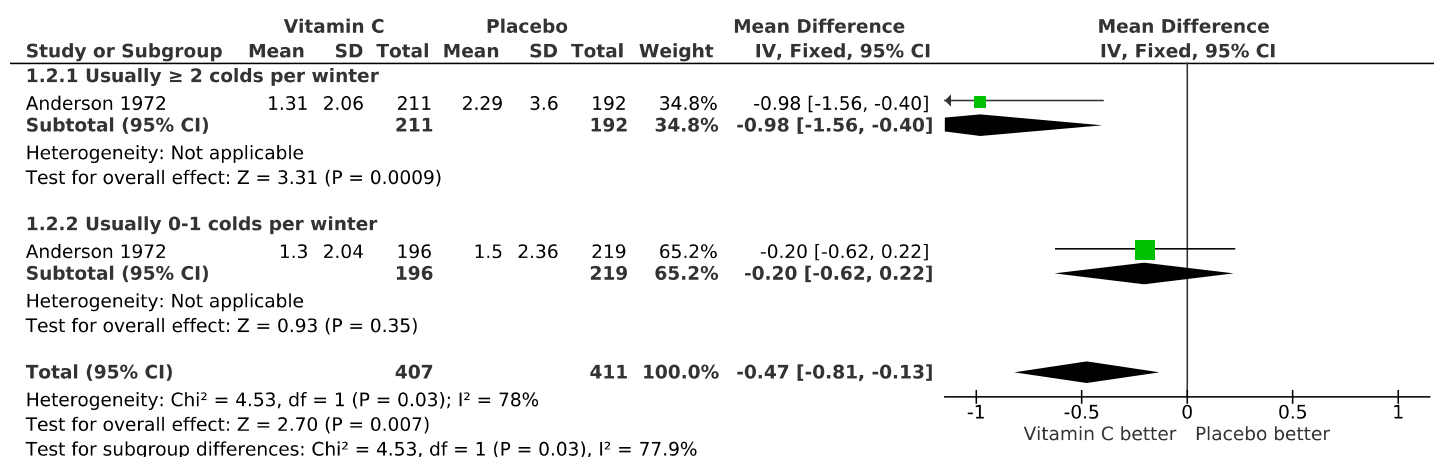

**Table 5. Subgroup comparison of the Carr (1981) trial by living together or living apart.**  
<https://www.ncbi.nlm.nih.gov/pubmed/7048833>

Carr (1981) reported that (Table 2):

|                         | Vitamin C | Placebo | Effect of vitamin C |
|-------------------------|-----------|---------|---------------------|
| <b>Living apart</b>     |           |         |                     |
| Mean duration of colds: | 4.86      | 7.50    | -35.2%              |
| No of colds:            | 94        | 71      |                     |
| <b>Living together</b>  |           |         |                     |
| Mean duration of colds: | 5.46      | 5.42    | +0.7%               |
| No of colds:            | 57        | 70      |                     |

SD for the duration of colds among twins living apart was calculated from the reported  $P < 0.01$ . Assuming  $P = 0.009$  corresponds to  $t(127 \text{ df}) = 2.62$ , which corresponds to SD 5.68 days. That SD value was used for both the vitamin C and placebo groups of twins living apart.

SD for twins living together was estimated from the relation that the ratio of SD/mean = 0.91 covers 80% of the reported ratios so that this ratio is conservative, see the last page. Thus SD = 4.9 days ( $= 0.91 \times 5.4 \text{ days}$ ) was used as the imputed SD for twins living together.

The test for subgroup differences  $\text{Chi}^2 (1 \text{ df}) = 4.44$  corresponds to  $P = 0.035$ .

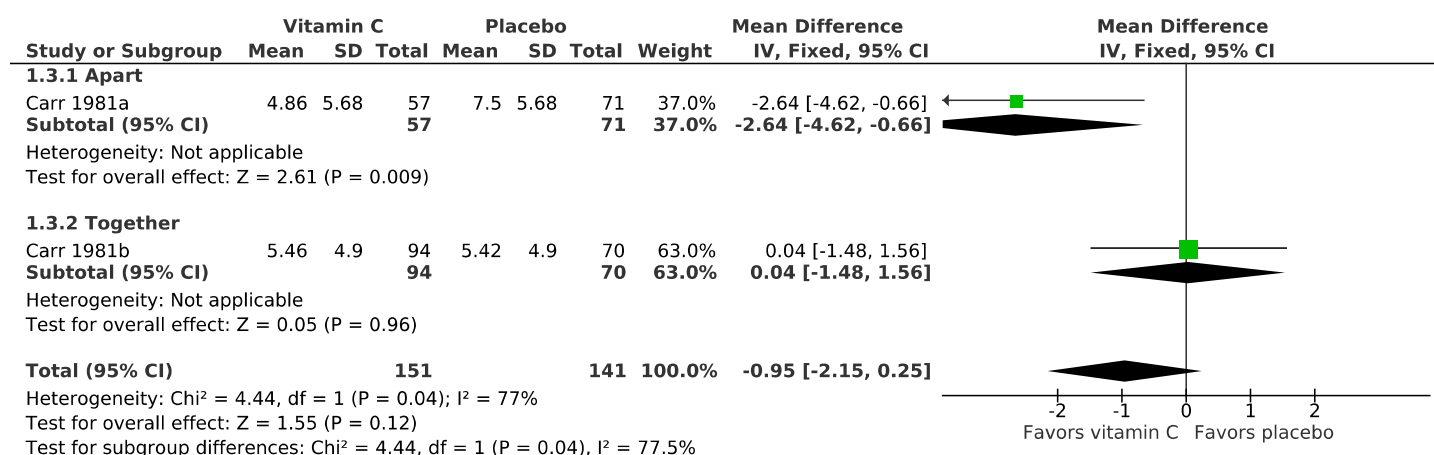

## Calculation of the ratio for common cold duration SD per mean for imputations

The imputation of SD was based on the analysis of 67 vitamin C and zinc lozenge study groups for which SD and mean were reported, see below.

The median for the ratio of SD/mean was 0.58 and the 80th percentile was 0.91.

The latter ratio **0.91** was used as the ratio to impute the SD value for the Carr (1981) trial.

The vitamin C trials are listed in Hemilä and Chalker (2013)

<https://www.ncbi.nlm.nih.gov/pubmed/23440782>

<http://www.mv.helsinki.fi/home/hemila/CC>

and the zinc lozenge trials are listed in Hemilä (2011)

<https://www.ncbi.nlm.nih.gov/pmc/articles/PMC3136969>

| Treatment groups           |                  |      | Placebo groups |                  |      | SD/mean<br>ratio<br>ordered<br>to find<br>quartiles | Ratio of SD/mean                                   |       |
|----------------------------|------------------|------|----------------|------------------|------|-----------------------------------------------------|----------------------------------------------------|-------|
| Vitamin C trials           | Duration in days |      |                | Duration in days |      |                                                     |                                                    |       |
|                            | mean             | SD   | Ratio          | mean             | SD   |                                                     | Ratio                                              |       |
|                            |                  |      |                |                  |      |                                                     |                                                    |       |
| <b>Prevention trials</b>   |                  |      |                |                  |      |                                                     | 0.17                                               |       |
| Anderson-1972              | 3.96             | 3.84 | 0.97           | 4.18             | 3.43 | 0.82                                                | 0.18                                               |       |
| Charleston-1972            | 3.55             | 1.93 | 0.55           | 4.21             | 0.82 | 0.20                                                | 0.20                                               |       |
| Clegg-1975                 | 7.2              | 3.1  | 0.43           | 7.6              | 3    | 0.39                                                | 0.22                                               |       |
| Elwood-1976                | 5.97             | 5.73 | 0.96           | 6.38             | 6.33 | 0.99                                                | 0.26                                               |       |
| Himmelstein 1998sed        | 2.5              | 1.1  | 0.44           | 4.2              | 3.5  | 0.83                                                | 0.35                                               |       |
| Johnston 2014              | 2.2              | 1.4  | 0.64           | 5.4              | 4.5  | 0.83                                                | 0.39                                               |       |
| Karlowski 1975a (#2)       | 6.71             | 3.82 | 0.57           | 7.14             | 3.71 | 0.52                                                | 0.42                                               |       |
| Karlowski 1975d (#3 vs #1) | 5.92             | 3.49 | 0.59           | 6.46             | 2.92 | 0.45                                                | 0.43                                               |       |
| Van Straten-2002           | 1.8              | 2.98 | 1.66           | 3.1              | 4.65 | 1.50                                                | 0.44                                               |       |
| Peters-1993 Runners        | 6                | 0.99 | 0.17           | 5.8              | 2.46 | 0.42                                                | 0.44                                               |       |
| Peters 1993a Sedentary     | 4.2              | 2.14 | 0.51           | 5.6              | 3.18 | 0.57                                                | 0.44                                               |       |
| Sabiston-1974              | 4.3              | 3    | 0.70           | 6                | 3    | 0.50                                                | 0.44                                               |       |
| Bancalari 1984             | 3.4              | 2.77 | 0.82           | 4.5              | 2.92 | 0.65                                                | 0.45                                               |       |
| Constantini 2011 Male      | 5.5              | 5    | 0.91           | 10.4             | 7.1  | 0.68                                                | 0.47                                               |       |
| Constantini 2011a Female   | 8.6              | 5.5  | 0.64           | 7.4              | 8.2  | 1.11                                                | 0.48                                               |       |
| Ludvigsson-1977 Pilot      | 8.9              | 5.96 | 0.67           | 14.53            | 9.75 | 0.67                                                | 0.48                                               |       |
| Ludvigsson-1977a Large     | 9.54             | 8.65 | 0.91           | 10.14            | 11.6 | 1.14                                                | 0.48                                               |       |
| Ritzel-1961                | 1.8              | 1.29 | 0.71           | 2.6              | 1.29 | 0.49                                                | 0.48                                               |       |
| Wilson_1973 Girls          | 2.62             | 3.67 | 1.40           | 3.1              | 4.15 | 1.34                                                | 0.48                                               |       |
| Wilson_1973a Boys          | 2.68             | 5.01 | 1.87           | 2.48             | 3.29 | 1.33                                                | 0.48                                               |       |
|                            |                  |      |                |                  |      |                                                     | 1st quartile                                       | 0.49  |
|                            |                  |      |                |                  |      |                                                     |                                                    | 0.49  |
|                            |                  |      |                |                  |      |                                                     |                                                    | 0.50  |
|                            |                  |      |                |                  |      |                                                     |                                                    | 0.50  |
|                            |                  |      |                |                  |      |                                                     |                                                    | 0.50  |
|                            |                  |      |                |                  |      |                                                     |                                                    | 0.51  |
|                            |                  |      |                |                  |      |                                                     |                                                    | 0.51  |
|                            |                  |      |                |                  |      |                                                     |                                                    | 0.52  |
|                            |                  |      |                |                  |      |                                                     | Half of the ratios<br>are between<br>0.49 and 0.82 | 0.52  |
|                            |                  |      |                |                  |      |                                                     |                                                    | 0.52  |
|                            |                  |      |                |                  |      |                                                     |                                                    | 0.53  |
|                            |                  |      |                |                  |      |                                                     |                                                    | 0.54  |
| <b>Treatment trials</b>    |                  |      |                |                  |      |                                                     |                                                    | 0.55  |
| Audera 2001 (1 g/day)      | 10.1             | 7    | 0.69           | 8.5              | 6.67 | 0.79                                                |                                                    | 0.55  |
| Audera 2001a (3 g/day)     | 10.4             | 6.67 | 0.64           |                  |      |                                                     |                                                    | 0.55  |
| Elwood 1977                | 5.89             | 2.77 | 0.47           | 6.29             | 2.78 | 0.44                                                |                                                    | 0.56  |
| Tyrrell 1977 (Males)       | 7.41             | 3.59 | 0.48           | 7.57             | 3.79 | 0.50                                                |                                                    | 0.57  |
| Tyrrell 1977a (Females)    | 8.96             | 5.3  | 0.59           | 8.24             | 4.78 | 0.58                                                |                                                    | 0.57  |
|                            |                  |      |                |                  |      |                                                     | Median                                             | 0.580 |
|                            |                  |      |                |                  |      |                                                     | 33                                                 | 0.58  |
| <b>Zinc lozenge trials</b> |                  |      |                |                  |      |                                                     |                                                    | 0.59  |
| Douglas 1987               | 12.10            | 9.80 | 0.81           | 7.70             | 9.80 | 1.27                                                |                                                    | 0.59  |
| Godfrey 1992               | 4.86             | 2.70 | 0.56           | 6.13             | 2.70 | 0.44                                                |                                                    | 0.64  |
| Macknin 1998               | 9.37             | 4.81 | 0.51           | 9.50             | 4.53 | 0.48                                                |                                                    | 0.64  |
| Mossad 1996                | 5.20             | 2.83 | 0.54           | 9.38             | 5.47 | 0.58                                                |                                                    | 0.64  |
| Petrus 1998                | 5.29             | 2.57 | 0.49           | 7.06             | 3.91 | 0.55                                                |                                                    | 0.65  |
| Prasad 2000                | 4.44             | 1.56 | 0.35           | 8.09             | 1.81 | 0.22                                                |                                                    | 0.67  |
| Prasad 2008                | 4.00             | 1.04 | 0.26           | 7.12             | 1.26 | 0.18                                                |                                                    | 0.67  |
| Turner 2000 A              | 7.41             | 3.88 | 0.52           | 7.55             | 3.96 | 0.52                                                |                                                    | 0.68  |
| Turner 2000 B              | 6.89             | 3.35 | 0.49           |                  |      |                                                     |                                                    | 0.69  |
| Turner 2000 C              | 7.90             | 4.20 | 0.53           |                  |      |                                                     |                                                    | 0.70  |
|                            |                  |      |                |                  |      |                                                     |                                                    | 0.72  |
|                            |                  |      |                |                  |      |                                                     | Median                                             | 0.58  |
|                            |                  |      |                |                  |      |                                                     | Mean                                               | 0.69  |
|                            |                  |      |                |                  |      |                                                     | Count                                              | 67    |
|                            |                  |      |                |                  |      |                                                     | 3rd quartile                                       | 0.82  |
|                            |                  |      |                |                  |      |                                                     |                                                    | 0.82  |
|                            |                  |      |                |                  |      |                                                     |                                                    | 0.83  |
|                            |                  |      |                |                  |      |                                                     |                                                    | 0.83  |
|                            |                  |      |                |                  |      |                                                     | 80th percentile                                    | 0.91  |
|                            |                  |      |                |                  |      |                                                     |                                                    | 0.91  |
|                            |                  |      |                |                  |      |                                                     |                                                    | 0.96  |
|                            |                  |      |                |                  |      |                                                     |                                                    | 0.97  |
|                            |                  |      |                |                  |      |                                                     | Elwood-1976                                        | 0.99  |
|                            |                  |      |                |                  |      |                                                     | Constantini 2011a Female                           | 1.11  |
|                            |                  |      |                |                  |      |                                                     | Ludvigsson-1977a Large                             | 1.14  |
|                            |                  |      |                |                  |      |                                                     | Douglas                                            | 1.27  |
|                            |                  |      |                |                  |      |                                                     | Wilson                                             | 1.33  |
|                            |                  |      |                |                  |      |                                                     | Wilson                                             | 1.34  |
|                            |                  |      |                |                  |      |                                                     | Wilson                                             | 1.40  |
|                            |                  |      |                |                  |      |                                                     | van Straten                                        | 1.50  |
|                            |                  |      |                |                  |      |                                                     | van Straten                                        | 1.66  |
|                            |                  |      |                |                  |      |                                                     | Wilson                                             | 1.87  |
|                            |                  |      |                |                  |      |                                                     |                                                    |       |
|                            |                  |      |                |                  |      |                                                     |                                                    |       |
|                            |                  |      |                |                  |      |                                                     |                                                    |       |
|                            |                  |      |                |                  |      |                                                     |                                                    |       |
|                            |                  |      |                |                  |      |                                                     |                                                    |       |
|                            |                  |      |                |                  |      |                                                     |                                                    |       |
|                            |                  |      |                |                  |      |                                                     |                                                    |       |
|                            |                  |      |                |                  |      |                                                     |                                                    |       |
|                            |                  |      |                |                  |      |                                                     |                                                    |       |
|                            |                  |      |                |                  |      |                                                     |                                                    |       |
|                            |                  |      |                |                  |      |                                                     |                                                    |       |
|                            |                  |      |                |                  |      |                                                     |                                                    |       |
|                            |                  |      |                |                  |      |                                                     |                                                    |       |
|                            |                  |      |                |                  |      |                                                     |                                                    |       |
|                            |                  |      |                |                  |      |                                                     |                                                    |       |
|                            |                  |      |                |                  |      |                                                     |                                                    |       |
|                            |                  |      |                |                  |      |                                                     |                                                    |       |
|                            |                  |      |                |                  |      |                                                     |                                                    |       |
|                            |                  |      |                |                  |      |                                                     |                                                    |       |
|                            |                  |      |                |                  |      |                                                     |                                                    |       |
|                            |                  |      |                |                  |      |                                                     |                                                    |       |
|                            |                  |      |                |                  |      |                                                     |                                                    |       |
|                            |                  |      |                |                  |      |                                                     |                                                    |       |
|                            |                  |      |                |                  |      |                                                     |                                                    |       |
|                            |                  |      |                |                  |      |                                                     |                                                    |       |
|                            |                  |      |                |                  |      |                                                     |                                                    |       |
|                            |                  |      |                |                  |      |                                                     |                                                    |       |
|                            |                  |      |                |                  |      |                                                     |                                                    |       |
|                            |                  |      |                |                  |      |                                                     |                                                    |       |
|                            |                  |      |                |                  |      |                                                     |                                                    |       |
|                            |                  |      |                |                  |      |                                                     |                                                    |       |
|                            |                  |      |                |                  |      |                                                     |                                                    |       |
|                            |                  |      |                |                  |      |                                                     |                                                    |       |
|                            |                  |      |                |                  |      |                                                     |                                                    |       |
|                            |                  |      |                |                  |      |                                                     |                                                    |       |
|                            |                  |      |                |                  |      |                                                     |                                                    |       |
|                            |                  |      |                |                  |      |                                                     |                                                    |       |
|                            |                  |      |                |                  |      |                                                     |                                                    |       |
|                            |                  |      |                |                  |      |                                                     |                                                    |       |
|                            |                  |      |                |                  |      |                                                     |                                                    |       |
|                            |                  |      |                |                  |      |                                                     |                                                    |       |
|                            |                  |      |                |                  |      |                                                     |                                                    |       |
|                            |                  |      |                |                  |      |                                                     |                                                    |       |
|                            |                  |      |                |                  |      |                                                     |                                                    |       |
|                            |                  |      |                |                  |      |                                                     |                                                    |       |
|                            |                  |      |                |                  |      |                                                     |                                                    |       |
|                            |                  |      |                |                  |      |                                                     |                                                    |       |
|                            |                  |      |                |                  |      |                                                     |                                                    |       |
|                            |                  |      |                |                  |      |                                                     |                                                    |       |
|                            |                  |      |                |                  |      |                                                     |                                                    |       |
|                            |                  |      |                |                  |      |                                                     |                                                    |       |
|                            |                  |      |                |                  |      |                                                     |                                                    |       |
|                            |                  |      |                |                  |      |                                                     |                                                    |       |
|                            |                  |      |                |                  |      |                                                     |                                                    |       |
|                            |                  |      |                |                  |      |                                                     |                                                    |       |
|                            |                  |      |                |                  |      |                                                     |                                                    |       |
|                            |                  |      |                |                  |      |                                                     |                                                    |       |
|                            |                  |      |                |                  |      |                                                     |                                                    |       |
|                            |                  |      |                |                  |      |                                                     |                                                    |       |
|                            |                  |      |                |                  |      |                                                     |                                                    |       |
|                            |                  |      |                |                  |      |                                                     |                                                    |       |
|                            |                  |      |                |                  |      |                                                     |                                                    |       |
|                            |                  |      |                |                  |      |                                                     |                                                    |       |
|                            |                  |      |                |                  |      |                                                     |                                                    |       |
|                            |                  |      |                |                  |      |                                                     |                                                    |       |
|                            |                  |      |                |                  |      |                                                     |                                                    |       |
|                            |                  |      |                |                  |      |                                                     |                                                    |       |
|                            |                  |      |                |                  |      |                                                     |                                                    |       |
|                            |                  |      |                |                  |      |                                                     |                                                    |       |
|                            |                  |      |                |                  |      |                                                     |                                                    |       |
|                            |                  |      |                |                  |      |                                                     |                                                    |       |
|                            |                  |      |                |                  |      |                                                     |                                                    |       |
|                            |                  |      |                |                  |      |                                                     |                                                    |       |
|                            |                  |      |                |                  |      |                                                     |                                                    |       |
|                            |                  |      |                |                  |      |                                                     |                                                    |       |
|                            |                  |      |                |                  |      |                                                     |                                                    |       |
|                            |                  |      |                |                  |      |                                                     |                                                    |       |
|                            |                  |      |                |                  |      |                                                     |                                                    |       |
|                            |                  |      |                |                  |      |                                                     |                                                    |       |
|                            |                  |      |                |                  |      |                                                     |                                                    |       |
|                            |                  |      |                |                  |      |                                                     |                                                    |       |
|                            |                  |      |                |                  |      |                                                     |                                                    |       |
|                            |                  |      |                |                  |      |                                                     |                                                    |       |
|                            |                  |      |                |                  |      |                                                     |                                                    |       |
|                            |                  |      |                |                  |      |                                                     |                                                    |       |
|                            |                  |      |                |                  |      |                                                     |                                                    |       |
|                            |                  |      |                |                  |      |                                                     |                                                    |       |
|                            |                  |      |                |                  |      |                                                     |                                                    |       |
|                            |                  |      |                |                  |      |                                                     |                                                    |       |
|                            |                  |      |                |                  |      |                                                     |                                                    |       |
|                            |                  |      |                |                  |      |                                                     |                                                    |       |
|                            |                  |      |                |                  |      |                                                     |                                                    |       |
|                            |                  |      |                |                  |      |                                                     |                                                    |       |
|                            |                  |      |                |                  |      |                                                     |                                                    |       |
|                            |                  |      |                |                  |      |                                                     |                                                    |       |
|                            |                  |      |                |                  |      |                                                     |                                                    |       |
|                            |                  |      |                |                  |      |                                                     |                                                    |       |
|                            |                  |      |                |                  |      |                                                     |                                                    |       |
|                            |                  |      |                |                  |      |                                                     |                                                    |       |
|                            |                  |      |                |                  |      |                                                     |                                                    |       |
|                            |                  |      |                |                  |      |                                                     |                                                    |       |
|                            |                  |      |                |                  |      |                                                     |                                                    |       |
|                            |                  |      |                |                  |      |                                                     |                                                    |       |
|                            |                  |      |                |                  |      |                                                     |                                                    |       |
|                            |                  |      |                |                  |      |                                                     |                                                    |       |
|                            |                  |      |                |                  |      |                                                     |                                                    |       |
|                            |                  |      |                |                  |      |                                                     |                                                    |       |

These might be  
classified as  
outliers
