# Supplementary material for: Vitamin C and Infections
Source: Nutrients. 2017 Mar 29;9(4):339. doi: 10.3390/nu9040339 (PMC5409678; doi:10.3390/nu9040339)
Supplement: Supplementary file 1 [file nutrients-09-00339-s001.zip › Hemila_Nutrients_Supplement_1.xls]

## Sheet: Cover
Vitamin C and infections
Supplementary file 1
Nutrients
http://www.mdpi.com/journal/nutrients
This file describes the data for the animal studies (Tables 1 to 3) and the construction of Figure 1
Harri Hemilä, MD, PhD
Department of Public Health,
POB 20 University of Helsinki
Tukholmankatu 8 B, FIN-00014 Helsinki
Finland
harri.hemila@helsinki.fi
http://www.mv.helsinki.fi/home/hemila

## Sheet: vitC_Fruits
Based on Appendix 3 in Hemilä 2006 [1](pp. 119-121)
https://helda.helsinki.fi/handle/10138/20335
Restricted to studies on guinea pigs
						All			TB		Bacteria (non-TB)		Diphtheria toxin
Vitamin C studies	All		TB	Bac non-TB	Diph toxin	P≤0.01	P≤0.001		P≤0.01	P≤0.001	P≤0.01	P≤0.001	P≤0.01	P≤0.001
Studies:	28		11	15	2	20	8		7	3	11	4	2	1
McConkey-1933	1		1						0	0
	1		1			1	1		1	1
	1		1			1			1	0
DeSavitsch-1934	1		1			1			1	0
Greene-1936	1		1						0	0
	1		1			1	1		1	1
	1		1						0	0
	1		1			1			1	0
	1		1						0	0
	1		1			1			1	0
Boyden-1955	1		1			1	1		1	1
Findlay-1923	1			1		1	1				1	1
	1			1							0	0
Werkman-1924	1			1							0	0
	1			1		1					1	0
Takahashi-1935	1			1		1					1	0
	1			1		1	1				1	1
Taylor-1937	1			1		1					1	0
Grant-1926	1			1		1					1	0
	1			1		1					1	0
Höjer-1924	1			1		1					1	0
	1			1		1					1	0
Schmid-W-1928	1			1		1	1				1	1
Karel-1941	1			1							0	0
	1			1							0	0
King-1935	1				1	1	1						1	1
	1				1	1							1	0
Schultz-1936	1			1		1	1				1	1
Studies:	28		11	15	2	20	8		7	3	11	4	2	1
Categories:	All		TB	Bac		All			TB		Bac non-TB
						P≤0.01	P≤0.001		P≤0.01	P≤0.001	P≤0.01	P≤0.001

## Sheet: vitC_pure
Based on Appendix 2 in Hemilä 2006 [1](pp. 105-118)																																						Level of significance
https://helda.helsinki.fi/handle/10138/20335																													Level of significance									Animal species
				1949	1950- 1989	1990									100											All			1949		1950- 1989		1990		1970-			Monkey		Guinea pig		Cow Sheep Rabbit		Cat		Rat		Gerbil Hamster
	Vitamin C studies	All					1970-	Monkey	Guinea pig	Cow Sheep Rabbit	Cat	Rat	Gerbil Hamster	Mouse	Mammal	Bird	Fish	TB	Bacteria non-TB	Bacterial Toxin	Virus	Candida albicans	Protozoa			P≤0.01	P≤0.001		P≤0.01	P≤0.001	P≤0.01	P≤0.001	P≤0.01	P≤0.001	P≤0.01	P≤0.001		P≤0.01	P≤0.001	P≤0.01	P≤0.001	P≤0.01	P≤0.001	P≤0.01	P≤0.001	P≤0.01	P≤0.001	P≤0.01	P≤0.001
	Studies	148		40	48	60	97	13	36	10	1	15	7	18	100	13	35	8	70	19	22	6	23			86	58		20	11	32	19	34	28	56	39		4	3	21	12	8	6	1	0	10	7	5	5
1937	Jungeblut-1937a	1		1	0	0		1							1						1					1	1		1	1	0	0	0	0	0	0		1	1	0	0	0	0	0	0	0	0	0	0
1937		1		1	0	0		1							1						1								0	0	0	0	0	0	0	0		0	0	0	0	0	0	0	0	0	0	0	0
1937		1		1	0	0		1							1						1								0	0	0	0	0	0	0	0		0	0	0	0	0	0	0	0	0	0	0	0
1937	Jungeblut-1937b	1		1	0	0		1							1						1								0	0	0	0	0	0	0	0		0	0	0	0	0	0	0	0	0	0	0	0
1937		1		1	0	0		1							1						1					1	1		1	1	0	0	0	0	0	0		1	1	0	0	0	0	0	0	0	0	0	0
1937		1		1	0	0		1							1						1								0	0	0	0	0	0	0	0		0	0	0	0	0	0	0	0	0	0	0	0
1937		1		1	0	0		1							1						1					1	1		1	1	0	0	0	0	0	0		1	1	0	0	0	0	0	0	0	0	0	0
1939	Sabin-1939	1		1	0	0		1							1						1								0	0	0	0	0	0	0	0		0	0	0	0	0	0	0	0	0	0	0	0
1939		1		1	0	0		1							1						1								0	0	0	0	0	0	0	0		0	0	0	0	0	0	0	0	0	0	0	0
1939		1		1	0	0		1							1						1								0	0	0	0	0	0	0	0		0	0	0	0	0	0	0	0	0	0	0	0
1939	Jungeblut-1939	1		1	0	0		1							1						1					1			1	0	0	0	0	0	0	0		1	0	0	0	0	0	0	0	0	0	0	0
1939		1		1	0	0		1							1						1								0	0	0	0	0	0	0	0		0	0	0	0	0	0	0	0	0	0	0	0
1974	Murphy-1974	1		0	1	0	1	1							1						1								0	0	0	0	0	0	0	0		0	0	0	0	0	0	0	0	0	0	0	0
1936	Steinbach-1936	1		1	0	0			1						1			1											0	0	0	0	0	0	0	0		0	0	0	0	0	0	0	0	0	0	0	0
1936		1		1	0	0			1						1			1								1			1	0	0	0	0	0	0	0		0	0	1	0	0	0	0	0	0	0	0	0
1938	Birkhaug-1938	1		1	0	0			1						1			1								1	1		1	1	0	0	0	0	0	0		0	0	1	1	0	0	0	0	0	0	0	0
1941	Kleimenh-1941	1		1	0	0			1						1			1											0	0	0	0	0	0	0	0		0	0	0	0	0	0	0	0	0	0	0	0
1941		1		1	0	0			1						1			1											0	0	0	0	0	0	0	0		0	0	0	0	0	0	0	0	0	0	0	0
1941	Steinbach-1941	1		1	0	0			1						1			1											0	0	0	0	0	0	0	0		0	0	0	0	0	0	0	0	0	0	0	0
1953	Gangadharam-1953	1		0	1	0			1						1			1											0	0	0	0	0	0	0	0		0	0	0	0	0	0	0	0	0	0	0	0
1956	Boyden-1956	1		0	1	0			1						1			1								1	1		0	0	1	1	0	0	0	0		0	0	1	1	0	0	0	0	0	0	0	0
1938	McCullough-1938	1		1	0	0			1						1				1							1	1		1	1	0	0	0	0	0	0		0	0	1	1	0	0	0	0	0	0	0	0
1938		1		1	0	0			1						1				1							1	1		1	1	0	0	0	0	0	0		0	0	1	1	0	0	0	0	0	0	0	0
1941	Karel-1941	1		1	0	0			1						1				1										0	0	0	0	0	0	0	0		0	0	0	0	0	0	0	0	0	0	0	0
1941		1		1	0	0			1						1				1										0	0	0	0	0	0	0	0		0	0	0	0	0	0	0	0	0	0	0	0
1943	Jones-1943	1		1	0	0			1						1				1										0	0	0	0	0	0	0	0		0	0	0	0	0	0	0	0	0	0	0	0
1991	Peck-1991a	1		0	0	1	1		1						1				1										0	0	0	0	0	0	0	0		0	0	0	0	0	0	0	0	0	0	0	0
1992	Nelson-1992	1		0	0	1	1		1						1				1										0	0	0	0	0	0	0	0		0	0	0	0	0	0	0	0	0	0	0	0
2001	Sjunnesson-2001	1		0	0	1	1		1						1				1										0	0	0	0	0	0	0	0		0	0	0	0	0	0	0	0	0	0	0	0
1983	Rogers-1983	1		0	1	0	1		1						1							1							0	0	0	0	0	0	0	0		0	0	0	0	0	0	0	0	0	0	0	0
1983		1		0	1	0	1		1						1							1				1			0	0	1	0	0	0	1	0		0	0	1	0	0	0	0	0	0	0	0	0
1983		1		0	1	0	1		1						1							1				1			0	0	1	0	0	0	1	0		0	0	1	0	0	0	0	0	0	0	0	0
1983		1		0	1	0	1		1						1							1				1			0	0	1	0	0	0	1	0		0	0	1	0	0	0	0	0	0	0	0	0
1937	Perla-1937	1		1	0	0			1						1								1			1	1		1	1	0	0	0	0	0	0		0	0	1	1	0	0	0	0	0	0	0	0
1937		1		1	0	0			1						1								1						0	0	0	0	0	0	0	0		0	0	0	0	0	0	0	0	0	0	0	0
1937		1		1	0	0			1						1								1			1	1		1	1	0	0	0	0	0	0		0	0	1	1	0	0	0	0	0	0	0	0
1951	Sadun-1951	1		0	1	0			1						1								1			1	1		0	0	1	1	0	0	0	0		0	0	1	1	0	0	0	0	0	0	0	0
1951		1		0	1	0			1						1								1			1	1		0	0	1	1	0	0	0	0		0	0	1	1	0	0	0	0	0	0	0	0
1975	Banic-1975	1		0	1	0	1		1						1						1					1	1		0	0	1	1	0	0	1	1		0	0	1	1	0	0	0	0	0	0	0	0
1935	Greenwald-1935	1		1	0	0			1						1					1						1			1	0	0	0	0	0	0	0		0	0	1	0	0	0	0	0	0	0	0	0
1935	Jungeblut-1935	1		1	0	0			1						1					1						1			1	0	0	0	0	0	0	0		0	0	1	0	0	0	0	0	0	0	0	0
1935		1		1	0	0			1						1					1						1			1	0	0	0	0	0	0	0		0	0	1	0	0	0	0	0	0	0	0	0
1936	Swanson-1936	1		1	0	0			1						1					1						1			1	0	0	0	0	0	0	0		0	0	1	0	0	0	0	0	0	0	0	0
1937	Sigal-1937	1		1	0	0			1						1					1						1			1	0	0	0	0	0	0	0		0	0	1	0	0	0	0	0	0	0	0	0
1937	Zilva-1937	1		1	0	0			1						1					1									0	0	0	0	0	0	0	0		0	0	0	0	0	0	0	0	0	0	0	0
1940	King-1940	1		1	0	0			1						1					1						1	1		1	1	0	0	0	0	0	0		0	0	1	1	0	0	0	0	0	0	0	0
1971	Fuller-1971	1		0	1	0	1		1						1					1						1	1		0	0	1	1	0	0	1	1		0	0	1	1	0	0	0	0	0	0	0	0
1971		1		0	1	0	1		1						1					1						1	1		0	0	1	1	0	0	1	1		0	0	1	1	0	0	0	0	0	0	0	0
1980	Kuenzig-1980	1		0	1	0	1		1						1					1									0	0	0	0	0	0	0	0		0	0	0	0	0	0	0	0	0	0	0	0
2002	Naresh-2002	1		0	0	1	1			1					1				1							1	1		0	0	0	0	1	1	1	1		0	0	0	0	1	1	0	0	0	0	0	0
2002		1		0	0	1	1			1					1				1							1	1		0	0	0	0	1	1	1	1		0	0	0	0	1	1	0	0	0	0	0	0
1967	Hamdy-1967	1		0	1	0				1					1				1							1	1		0	0	1	1	0	0	0	0		0	0	0	0	1	1	0	0	0	0	0	0
1994	Dwenger-1994	1		0	0	1	1			1					1					1						1	1		0	0	0	0	1	1	1	1		0	0	0	0	1	1	0	0	0	0	0	0
1939	Busing-1939	1		1	0	0				1					1				1							1			1	0	0	0	0	0	0	0		0	0	0	0	1	0	0	0	0	0	0	0
1939		1		1	0	0				1					1				1										0	0	0	0	0	0	0	0		0	0	0	0	0	0	0	0	0	0	0	0
1937	Locke-1937	1		1	0	0				1					1				1										0	0	0	0	0	0	0	0		0	0	0	0	0	0	0	0	0	0	0	0
1939	Locke-1939	1		1	0	0				1					1				1							1			1	0	0	0	0	0	0	0		0	0	0	0	1	0	0	0	0	0	0	0
1963	Fukuda-1963	1		0	1	0				1					1					1						1	1		0	0	1	1	0	0	0	0		0	0	0	0	1	1	0	0	0	0	0	0
1963		1		0	1	0				1					1					1						1	1		0	0	1	1	0	0	0	0		0	0	0	0	1	1	0	0	0	0	0	0
1968	Edwards-1968	1		0	1	0					1				1						1					1			0	0	1	0	0	0	0	0		0	0	0	0	0	0	1	0	0	0	0	0
1992	Matsumoto-1992	1		0	0	1	1					1			1				1										0	0	0	0	0	0	0	0		0	0	0	0	0	0	0	0	0	0	0	0
1992		1		0	0	1	1					1			1				1										0	0	0	0	0	0	0	0		0	0	0	0	0	0	0	0	0	0	0	0
1998	Miyagatani-1998	1		0	0	1	1					1			1				1										0	0	0	0	0	0	0	0		0	0	0	0	0	0	0	0	0	0	0	0
2001	Armour-2001	1		0	0	1	1					1			1				1							1	1		0	0	0	0	1	1	1	1		0	0	0	0	0	0	0	0	1	1	0	0
2001		1		0	0	1	1					1			1				1							1			0	0	0	0	1	0	1	0		0	0	0	0	0	0	0	0	1	0	0	0
2002	Kasterbauer-2002	1		0	0	1	1					1			1				1										0	0	0	0	0	0	0	0		0	0	0	0	0	0	0	0	0	0	0	0
2002		1		0	0	1	1					1			1				1										0	0	0	0	0	0	0	0		0	0	0	0	0	0	0	0	0	0	0	0
2005	Tyml-2005	1		0	0	1	1					1			1				1							1			0	0	0	0	1	0	1	0		0	0	0	0	0	0	0	0	1	0	0	0
2005		1		0	0	1	1					1			1				1							1	1		0	0	0	0	1	1	1	1		0	0	0	0	0	0	0	0	1	1	0	0
2005		1		0	0	1	1					1			1				1							1			0	0	0	0	1	0	1	0		0	0	0	0	0	0	0	0	1	0	0	0
1966	Dey-1966	1		0	1	0						1			1					1						1	1		0	0	1	1	0	0	0	0		0	0	0	0	0	0	0	0	1	1	0	0
1966		1		0	1	0						1			1					1						1	1		0	0	1	1	0	0	0	0		0	0	0	0	0	0	0	0	1	1	0	0
2004	Feng-2004	1		0	0	1	1					1			1					1						1	1		0	0	0	0	1	1	1	1		0	0	0	0	0	0	0	0	1	1	0	0
2005	Kanter-2005	1		0	0	1	1					1			1					1						1	1		0	0	0	0	1	1	1	1		0	0	0	0	0	0	0	0	1	1	0	0
2005		1		0	0	1	1					1			1					1						1	1		0	0	0	0	1	1	1	1		0	0	0	0	0	0	0	0	1	1	0	0
1997	Zhang-1997	1		0	0	1	1						1		1				1							1	1		0	0	0	0	1	1	1	1		0	0	0	0	0	0	0	0	0	0	1	1
1997		1		0	0	1	1						1		1				1							1	1		0	0	0	0	1	1	1	1		0	0	0	0	0	0	0	0	0	0	1	1
2002	Garg-2002	1		0	0	1	1						1		1								1			1	1		0	0	0	0	1	1	1	1		0	0	0	0	0	0	0	0	0	0	1	1
2002		1		0	0	1	1						1		1								1			1	1		0	0	0	0	1	1	1	1		0	0	0	0	0	0	0	0	0	0	1	1
2002		1		0	0	1	1						1		1								1			1	1		0	0	0	0	1	1	1	1		0	0	0	0	0	0	0	0	0	0	1	1
2002		1		0	0	1	1						1		1								1						0	0	0	0	0	0	0	0		0	0	0	0	0	0	0	0	0	0	0	0
2002		1		0	0	1	1						1		1								1						0	0	0	0	0	0	0	0		0	0	0	0	0	0	0	0	0	0	0	0
1976	Hastings-1976	1		0	1	0	1							1	1				1							1			0	0	1	0	0	0	1	0		0	0	0	0	0	0	0	0	0	0	0	0
1976		1		0	1	0	1							1	1				1							1			0	0	1	0	0	0	1	0		0	0	0	0	0	0	0	0	0	0	0	0
1976		1		0	1	0	1							1	1				1										0	0	0	0	0	0	0	0		0	0	0	0	0	0	0	0	0	0	0	0
1986	Esposito-1986	1		0	1	0	1							1	1				1										0	0	0	0	0	0	0	0		0	0	0	0	0	0	0	0	0	0	0	0
1990	Fang-1990	1		0	1	0	1							1	1				1										0	0	0	0	0	0	0	0		0	0	0	0	0	0	0	0	0	0	0	0
1990		1		0	1	0	1							1	1				1										0	0	0	0	0	0	0	0		0	0	0	0	0	0	0	0	0	0	0	0
1979	Gallin-1979	1		0	1	0	1							1	1							1							0	0	0	0	0	0	0	0		0	0	0	0	0	0	0	0	0	0	0	0
1979		1		0	1	0	1							1	1							1				1	1		0	0	1	1	0	0	1	1		0	0	0	0	0	0	0	0	0	0	0	0
2000	Wang-2000	1		0	0	1	1							1	1				1							1	1		0	0	0	0	1	1	1	1		0	0	0	0	0	0	0	0	0	0	0	0
2003	Wu-2003	1		0	0	1	1							1	1				1										0	0	0	0	0	0	0	0		0	0	0	0	0	0	0	0	0	0	0	0
2004	Wu-2004	1		0	0	1	1							1	1				1							1	1		0	0	0	0	1	1	1	1		0	0	0	0	0	0	0	0	0	0	0	0
2004		1		0	0	1	1							1	1				1										0	0	0	0	0	0	0	0		0	0	0	0	0	0	0	0	0	0	0	0
1974	Seah-1974	1		0	1	0	1							1	1								1			1	1		0	0	1	1	0	0	1	1		0	0	0	0	0	0	0	0	0	0	0	0
1974		1		0	1	0	1							1	1								1			1	1		0	0	1	1	0	0	1	1		0	0	0	0	0	0	0	0	0	0	0	0
1980	Bourke-1980	1		0	1	0	1							1	1								1						0	0	0	0	0	0	0	0		0	0	0	0	0	0	0	0	0	0	0	0
1980		1		0	1	0	1							1	1								1						0	0	0	0	0	0	0	0		0	0	0	0	0	0	0	0	0	0	0	0
1939	Buller-Souto-1939	1		1	0	0								1	1				1							1	1		1	1	0	0	0	0	0	0		0	0	0	0	0	0	0	0	0	0	0	0
1939		1		1	0	0								1	1				1							1	1		1	1	0	0	0	0	0	0		0	0	0	0	0	0	0	0	0	0	0	0
1955	Hill-1955	1		0	1	0										1			1							1			0	0	1	0	0	0	0	0		0	0	0	0	0	0	0	0	0	0	0	0
1971	Little-1971	1		0	1	0	1									1							1						0	0	0	0	0	0	0	0		0	0	0	0	0	0	0	0	0	0	0	0
1971		1		0	1	0	1									1							1						0	0	0	0	0	0	0	0		0	0	0	0	0	0	0	0	0	0	0	0
1988	Gross-1988a	1		0	1	0	1									1			1							1	1		0	0	1	1	0	0	1	1		0	0	0	0	0	0	0	0	0	0	0	0
1988		1		0	1	0	1									1			1							1			0	0	1	0	0	0	1	0		0	0	0	0	0	0	0	0	0	0	0	0
1988	Gross-1988b	1		0	1	0	1									1			1							1			0	0	1	0	0	0	1	0		0	0	0	0	0	0	0	0	0	0	0	0
1992	Gross-1992	1		0	0	1	1									1			1							1	1		0	0	0	0	1	1	1	1		0	0	0	0	0	0	0	0	0	0	0	0
1992		1		0	0	1	1									1			1										0	0	0	0	0	0	0	0		0	0	0	0	0	0	0	0	0	0	0	0
1992		1		0	0	1	1									1			1										0	0	0	0	0	0	0	0		0	0	0	0	0	0	0	0	0	0	0	0
1992	Davelaar-1992	1		0	0	1	1									1					1					1	1		0	0	0	0	1	1	1	1		0	0	0	0	0	0	0	0	0	0	0	0
1992		1		0	0	1	1									1					1					1	1		0	0	0	0	1	1	1	1		0	0	0	0	0	0	0	0	0	0	0	0
2000	Amakye-2000	1		0	0	1	1									1					1					1	1		0	0	0	0	1	1	1	1		0	0	0	0	0	0	0	0	0	0	0	0
1936	Hanzlik-1936	1		1	0	0										1				1									0	0	0	0	0	0	0	0		0	0	0	0	0	0	0	0	0	0	0	0
1982	Durve-1982	1		0	1	0	1										1		1							1	1		0	0	1	1	0	0	1	1		0	0	0	0	0	0	0	0	0	0	0	0
1982		1		0	1	0	1										1		1							1			0	0	1	0	0	0	1	0		0	0	0	0	0	0	0	0	0	0	0	0
1985	Li-1985	1		0	1	0	1										1		1							1	1		0	0	1	1	0	0	1	1		0	0	0	0	0	0	0	0	0	0	0	0
1989	Liu-1989	1		0	1	0	1										1		1							1			0	0	1	0	0	0	1	0		0	0	0	0	0	0	0	0	0	0	0	0
1993	Li-1993	1		0	0	1	1										1		1							1	1		0	0	0	0	1	1	1	1		0	0	0	0	0	0	0	0	0	0	0	0
1993		1		0	0	1	1										1		1										0	0	0	0	0	0	0	0		0	0	0	0	0	0	0	0	0	0	0	0
1994	Duncan-1994	1		0	0	1	1										1		1										0	0	0	0	0	0	0	0		0	0	0	0	0	0	0	0	0	0	0	0
1994		1		0	0	1	1										1		1							1	1		0	0	0	0	1	1	1	1		0	0	0	0	0	0	0	0	0	0	0	0
1994		1		0	0	1	1										1		1										0	0	0	0	0	0	0	0		0	0	0	0	0	0	0	0	0	0	0	0
1994		1		0	0	1	1										1		1										0	0	0	0	0	0	0	0		0	0	0	0	0	0	0	0	0	0	0	0
1994		1		0	0	1	1										1		1										0	0	0	0	0	0	0	0		0	0	0	0	0	0	0	0	0	0	0	0
1994		1		0	0	1	1										1		1										0	0	0	0	0	0	0	0		0	0	0	0	0	0	0	0	0	0	0	0
2000	Lim-2000	1		0	0	1	1										1		1										0	0	0	0	0	0	0	0		0	0	0	0	0	0	0	0	0	0	0	0
2000		1		0	0	1	1										1		1							1	1		0	0	0	0	1	1	1	1		0	0	0	0	0	0	0	0	0	0	0	0
1986	Wahli-1986	1		0	1	0	1										1						1			1	1		0	0	1	1	0	0	1	1		0	0	0	0	0	0	0	0	0	0	0	0
1986		1		0	1	0	1										1						1			1	1		0	0	1	1	0	0	1	1		0	0	0	0	0	0	0	0	0	0	0	0
1989	Navarre-1989	1		0	1	0	1										1		1							1			0	0	1	0	0	0	1	0		0	0	0	0	0	0	0	0	0	0	0	0
1989		1		0	1	0	1										1		1							1			0	0	1	0	0	0	1	0		0	0	0	0	0	0	0	0	0	0	0	0
1989		1		0	1	0	1										1		1										0	0	0	0	0	0	0	0		0	0	0	0	0	0	0	0	0	0	0	0
1995	Wahli-1995	1		0	0	1	1										1						1			1	1		0	0	0	0	1	1	1	1		0	0	0	0	0	0	0	0	0	0	0	0
1995		1		0	0	1	1										1						1			1	1		0	0	0	0	1	1	1	1		0	0	0	0	0	0	0	0	0	0	0	0
1998	Wahli-1998	1		0	0	1	1										1				1								0	0	0	0	0	0	0	0		0	0	0	0	0	0	0	0	0	0	0	0
1998		1		0	0	1	1										1				1					1	1		0	0	0	0	1	1	1	1		0	0	0	0	0	0	0	0	0	0	0	0
1998		1		0	0	1	1										1		1							1	1		0	0	0	0	1	1	1	1		0	0	0	0	0	0	0	0	0	0	0	0
1998		1		0	0	1	1										1		1										0	0	0	0	0	0	0	0		0	0	0	0	0	0	0	0	0	0	0	0
1998		1		0	0	1	1										1						1			1	1		0	0	0	0	1	1	1	1		0	0	0	0	0	0	0	0	0	0	0	0
1998		1		0	0	1	1										1						1						0	0	0	0	0	0	0	0		0	0	0	0	0	0	0	0	0	0	0	0
1991	Hardie-1991	1		0	0	1	1										1		1							1	1		0	0	0	0	1	1	1	1		0	0	0	0	0	0	0	0	0	0	0	0
1993	Waagbo-1993	1		0	0	1	1										1		1										0	0	0	0	0	0	0	0		0	0	0	0	0	0	0	0	0	0	0	0
1999	Lygren-1999	1		0	0	1	1										1				1					1			0	0	0	0	1	0	1	0		0	0	0	0	0	0	0	0	0	0	0	0
1999		1		0	0	1	1										1				1					1			0	0	0	0	1	0	1	0		0	0	0	0	0	0	0	0	0	0	0	0
1984	Bell-1984	1		0	1	0	1										1		1										0	0	0	0	0	0	0	0		0	0	0	0	0	0	0	0	0	0	0	0
1984		1		0	1	0	1										1		1										0	0	0	0	0	0	0	0		0	0	0	0	0	0	0	0	0	0	0	0
2002	Sobhana-2002	1		0	0	1	1										1		1										0	0	0	0	0	0	0	0		0	0	0	0	0	0	0	0	0	0	0	0
1998	Martins-1998	1		0	0	1	1										1						1			1			0	0	0	0	1	0	1	0		0	0	0	0	0	0	0	0	0	0	0	0
[truncated: 20 more columns]

## Sheet: vitC_mortality
Based on Appendix 2 in Hemilä 2006 [1](pp. 105-118)
https://helda.helsinki.fi/handle/10138/20335
This analysis is restricted to studies in which vitamin C decreased mortality of mammals by P(1-tail)<0.025, corresponding to P(2-tail)<0.05
											Mortality	TB	Bacteria (non-TB)	Toxin	Virus	Candida	Protozoa
	Vitamin C studies	All		TB	Bacteria non-TB	Toxin	Virus	Candida	Protozoa		P≤0.025
																		sum
	Studies	100		8	39	18	15	6	14		29	6	7	6	1	2	7	29
1937	Jungeblut-1937a	1					1					0	0	0	0	0	0
1937		1					1					0	0	0	0	0	0
1937		1					1					0	0	0	0	0	0
1937	Jungeblut-1937b	1					1					0	0	0	0	0	0
1937		1					1					0	0	0	0	0	0
1937		1					1					0	0	0	0	0	0
1937		1					1					0	0	0	0	0	0
1939	Sabin-1939	1					1					0	0	0	0	0	0
1939		1					1					0	0	0	0	0	0
1939		1					1					0	0	0	0	0	0
1939	Jungeblut-1939	1					1					0	0	0	0	0	0
1939		1					1					0	0	0	0	0	0
1974	Murphy-1974	1					1					0	0	0	0	0	0
1936	Steinbach-1936	1		1							1	1	0	0	0	0	0
1936		1		1							1	1	0	0	0	0	0
1938	Birkhaug-1938	1		1								0	0	0	0	0	0
1941	Kleimenh-1941	1		1							1	1	0	0	0	0	0
1941		1		1							1	1	0	0	0	0	0
1941	Steinbach-1941	1		1							1	1	0	0	0	0	0
1953	Gangadharam-1953	1		1								0	0	0	0	0	0
1956	Boyden-1956	1		1							1	1	0	0	0	0	0
1938	McCullough-1938	1			1							0	0	0	0	0	0
1938		1			1							0	0	0	0	0	0
1941	Karel-1941	1			1							0	0	0	0	0	0
1941		1			1							0	0	0	0	0	0
1943	Jones-1943	1			1						1	0	1	0	0	0	0
1991	Peck-1991a	1			1							0	0	0	0	0	0
1992	Nelson-1992	1			1							0	0	0	0	0	0
2001	Sjunnesson-2001	1			1							0	0	0	0	0	0
1983	Rogers-1983	1						1				0	0	0	0	0	0
1983		1						1				0	0	0	0	0	0
1983		1						1				0	0	0	0	0	0
1983		1						1				0	0	0	0	0	0
1937	Perla-1937	1							1		1	0	0	0	0	0	1
1937		1							1			0	0	0	0	0	0
1937		1							1		1	0	0	0	0	0	1
1951	Sadun-1951	1							1			0	0	0	0	0	0
1951		1							1		1	0	0	0	0	0	1
1975	Banic-1975	1					1				1	0	0	0	1	0	0
1935	Greenwald-1935	1				1					1	0	0	1	0	0	0
1935	Jungeblut-1935	1				1					1	0	0	1	0	0	0
1935		1				1						0	0	0	0	0	0
1936	Swanson-1936	1				1						0	0	0	0	0	0
1937	Sigal-1937	1				1					1	0	0	1	0	0	0
1937	Zilva-1937	1				1						0	0	0	0	0	0
1940	King-1940	1				1						0	0	0	0	0	0
1971	Fuller-1971	1				1					1	0	0	1	0	0	0
1971		1				1						0	0	0	0	0	0
1980	Kuenzig-1980	1				1						0	0	0	0	0	0
2002	Naresh-2002	1			1							0	0	0	0	0	0
2002		1			1							0	0	0	0	0	0
1967	Hamdy-1967	1			1							0	0	0	0	0	0
1994	Dwenger-1994	1				1						0	0	0	0	0	0
1939	Busing-1939	1			1						1	0	1	0	0	0	0
1939		1			1							0	0	0	0	0	0
1937	Locke-1937	1			1							0	0	0	0	0	0
1939	Locke-1939	1			1						1	0	1	0	0	0	0
1963	Fukuda-1963	1				1						0	0	0	0	0	0
1963		1				1						0	0	0	0	0	0
1968	Edwards-1968	1					1					0	0	0	0	0	0
1992	Matsumoto-1992	1			1							0	0	0	0	0	0
1992		1			1							0	0	0	0	0	0
1998	Miyagatani-1998	1			1						1	0	1	0	0	0	0
2001	Armour-2001	1			1							0	0	0	0	0	0
2001		1			1							0	0	0	0	0	0
2002	Kasterbauer-2002	1			1							0	0	0	0	0	0
2002		1			1							0	0	0	0	0	0
2005	Tyml-2005	1			1							0	0	0	0	0	0
2005		1			1							0	0	0	0	0	0
2005		1			1							0	0	0	0	0	0
1966	Dey-1966	1				1					1	0	0	1	0	0	0
1966		1				1					1	0	0	1	0	0	0
2004	Feng-2004	1				1						0	0	0	0	0	0
2005	Kanter-2005	1				1						0	0	0	0	0	0
2005		1				1						0	0	0	0	0	0
1997	Zhang-1997	1			1							0	0	0	0	0	0
1997		1			1							0	0	0	0	0	0
2002	Garg-2002	1							1		1	0	0	0	0	0	1
2002		1							1		1	0	0	0	0	0	1
2002		1							1			0	0	0	0	0	0
2002		1							1			0	0	0	0	0	0
2002		1							1			0	0	0	0	0	0
1976	Hastings-1976	1			1							0	0	0	0	0	0
1976		1			1							0	0	0	0	0	0
1976		1			1							0	0	0	0	0	0
1986	Esposito-1986	1			1							0	0	0	0	0	0
1990	Fang-1990	1			1							0	0	0	0	0	0
1990		1			1							0	0	0	0	0	0
1979	Gallin-1979	1						1			1	0	0	0	0	1	0
1979		1						1			1	0	0	0	0	1	0
2000	Wang-2000	1			1							0	0	0	0	0	0
2003	Wu-2003	1			1							0	0	0	0	0	0
2004	Wu-2004	1			1						1	0	1	0	0	0	0
2004		1			1							0	0	0	0	0	0
1974	Seah-1974	1							1		1	0	0	0	0	0	1
1974		1							1		1	0	0	0	0	0	1
1980	Bourke-1980	1							1			0	0	0	0	0	0
1980		1							1			0	0	0	0	0	0
1939	Buller-Souto-1939	1			1						1	0	1	0	0	0	0
1939		1			1						1	0	1	0	0	0	0
	Studies	100		8	39	18	15	6	14		29	6	7	6	1	2	7

## Sheet: VitC Trials
	Vitamin C studies, >=1 g/day vitamin C			Participants in groups
	Studies collected by Hemilä and Chalker (2013)
	http://www.mv.helsinki.fi/home/hemila/CC
	https://www.ncbi.nlm.nih.gov/pubmed/23440782
Year	Study	Regular	Therapy	N (vit C)	N (Plac)				2 year periods
	Included
1945	Brown 1945		1	179	119	1945			1945	298
1961	Ritzel 1961	1		139	140	1961			1960	279
1967	Walker 1967	3		47	44	1967			1962	0
1968	Abbott 1968		3	147	123	1968			1964	0
1972	Anderson 1972	1	3	407	411	1972			1966	91
1972	Charleston 1972	1		47	43	1972			1968	270
1972	Liljefors 1972	2		33	33	1972			1970	0
1973	Elliott 1973	2		37	33	1973			1972	1065
1973	Schwartz 1973	3		11	10	1973			1974	3500
1974	Anderson 1974a	1	3	277	285	1974			1976	3170
1974	Anderson 1974b	1		275	0	1974			1978	674
1974	Anderson 1974c	2		308	0	1974			1980	190
1974	Anderson 1974e		4	275	0	1974			1982	0
1974	Anderson 1974f		8	308	0	1974			1984	590
1974	Coulehan 1974a	2		131	128	1974			1986	0
1974	Coulehan 1974b	1		190	192	1974			1988	0
1974	Sabiston 1974	1		56	56	1974			1990	48
1975	Anderson 1975a		1.5	150	146	1975			1992	0
1975	Anderson 1975b		1.5	152	0	1975			1994	0
1975	Carson 1975	1		121	123	1975			1996	0
1975	Clegg 1975	1		67	70	1975			1998	92
1975	Karlowski 1975a	3		44	46	1975			2000	139
1975	Karlowski 1975b	3	3	57	0	1975			2002	168
1975	Karlowski 1975c		3	43	0	1975			2004	0
1976	Coulehan 1976	1		428	428	1976			2006	0
1976	Elwood 1976	1		339	349	1976			2008	24
1977	Asfora 1977		6	42	41	1977			2010	39
1977	Elwood 1977		4	145	119	1977			2012	0
1977	Ludvigsson 1977a	1		80	78	1977			2014	28
1977	Ludvigsson 1977b	1		304	311	1977
1977	Miller 1977a	1		12	12	1977				10665
1977	Tyrrell 1977		4	225	257	1977
1979	Pitt 1979	2		331	343	1979
1981	Carr 1981	1		51	51	1981			Time ranges			In the time ranges
1981	Carr 1981			44	44	1981						Rate of studies
1984	Bancalari 1984	2		32	30	1984			1972	published	total	Studies/yr
1984	Briggs 1984	1	4	265	263	1984			to	trials	participants
1990	Dick 1990	1		24	24	1990			1979	29	8409	3.625
1998	Himmelstein 1998b	1		30	14	1998					participants per study
1998	Himmelstein 1998a	1		23	25	1998		Years	8		289.966
2001	Audera 2001a		1	47	42	2001
2001	Audera 2001b		3	50	0	2001
2002	van Straten 2002	1		84	84	2002
2008	Carillo 2008a	1.5		6	6	2008			1985	published	total
2008	Carillo 2008b	1.5		6	6	2008			to	trials	participants
2011	Constantini 2011	1		12	10	2011			2014	11	538	0.366667
2011	Constantini 2011			9	8	2011					participants per study
2014	Johnston 2014	1		15	13	2014		Years	30		48.9091
			Total N	6105	4560
			Total N		10665

## Sheet: Anderson (1972) subgroups
		Anderson (1972)
		Vitamin C	Placebo
	N	407	411
Reported	SE	0.101	0.138	Days confined to house
Calculated	SD	2.0376	2.79769	Days confined to house
Reported	Mean	1.3	1.87	Days confined to house
		1.56738	1.49609	Ratio SD/mean
		1.57					Effect of vitamin C	Test of heterogeneity
				N	N		in the subgroup	Chi-sq	P
	Contact with young children	1.31	2.43	140	148		-0.460905
	SD imputed with ratio 1.57	2.0567	3.8151	N	N			4.42	0.03552
	No contact with young children	1.3	1.56	267	263		-0.166667
	SD imputed with ratio 1.57	2.041	2.4492
		53.9095	100
		84.6379	157
		83.3333	100
		130.833	157
				N	N
	0-1 colds usually	1.3	1.5	196	219		-0.133333
	SD imputed with ratio 1.57	2.041	2.355	N	N			4.53	0.0333056
	>=2 colds usually	1.31	2.29	211	192		-0.427948
	SD imputed with ratio 1.57	2.0567	3.5953
